# Supplementary material
Source: MDPI journal article supplement (https://www.mdpi.com/2673-5636/2/4/45)
Supplement: s1 [file s1]

Supplementary Material

# It's Virtually Summer, Can the Zoo Come to You? Zoo Summer School Engagement in an Online Setting

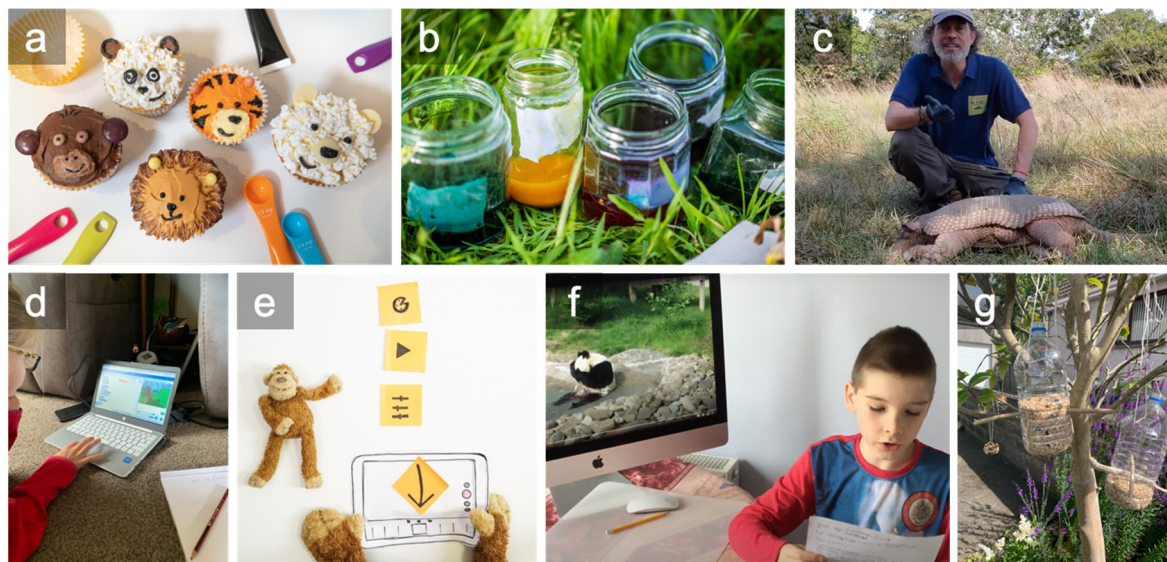

**Figure S1.** Example Discoveries from VSS (a) Zoo Cupcakes, (b) Nature Art, (c) Conservation Expert, (d) Coding Mission, (e) Stop Motion, (f) Commentary Challenge and (g) Wildlife Live.

## Pre-Questionnaire—Before you begin

\* Required

Please fill in your answers to the questions below as a family.

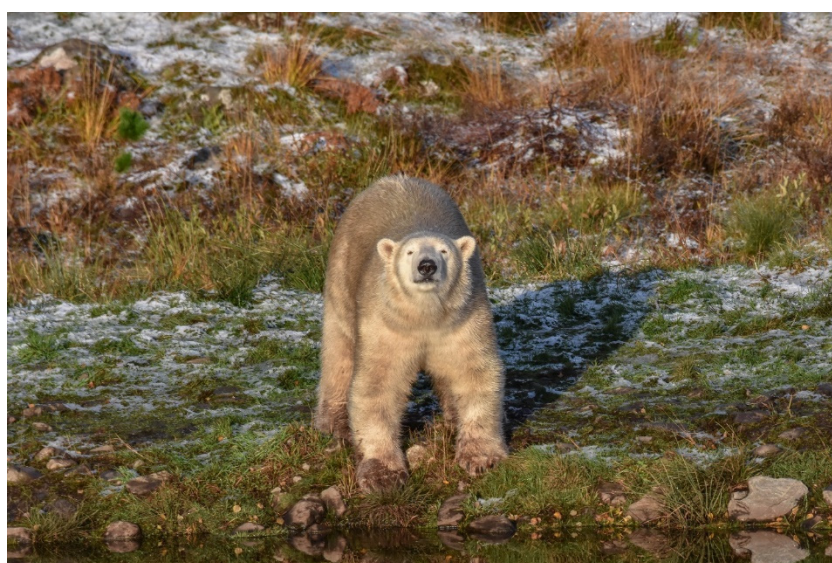

How much time do you spend as a whole family completing activities together each day on average?

0–1–2–3–4–5–6–7–8–9–10  
0—No time at all

10—Every minute

What're some of your favourite things to do as a family?

Your answer

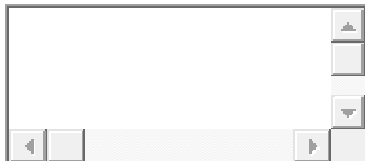

How many people in your family will be taking part in VSS this week? \*



Your answer

How much do you love nature?

0-1-2-3-4-5-6-7-8-9-10

0—Not at all

10—So, so, so much!

How much do you love Edinburgh Zoo animals?

0-1-2-3-4-5-6-7-8-9-10

0—Not at all

10—So, so, so much!

How much do you love Highland Wildlife Park animals?

0-1-2-3-4-5-6-7-8-9-10

0—Not at all

10—So, so, so much!

How much do you love animal stories?

0-1-2-3-4-5-6-7-8-9-10

0—Not at all

10—So, so, so much!

**Post-Questionnaire—Your last challenge!**

\* Required

Please fill in your answers to the questions below as a family.

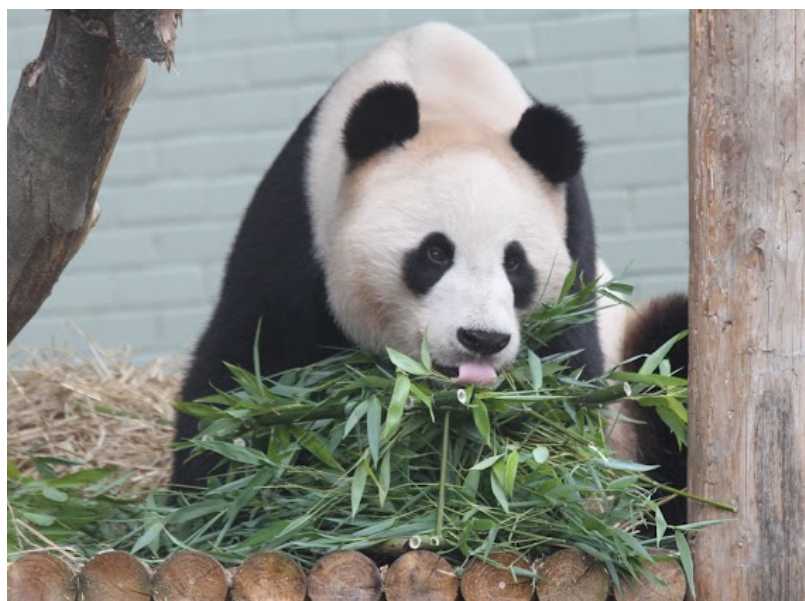

How much time did you spend as a whole family completing the activities together each day this week? \*

0-1-2-3-4-5-6-7-8-9-10

hours

What're some of your favourite things to do as a family now?

Your answer

How many of your family (including you) and friends took part in total this week? \*

Your answer

Tick the age groups of the people that were involved in this week. \*

- 1-3 years old
- 4 years old
- 5 years old
- 6 years old
- 7 years old
- 8 years old
- 9 years old
- 10 years old
- 11 years old
- 12-15 years old
- 16-18 years old
- 19 + years old

How much do you love nature now? \*

0-1-2-3-4-5  
0—Not at all  
5—So, so, so much!

How much do you love Edinburgh Zoo animals now? \*

0-1-2-3-4-5  
0—Not at all  
5—So, so, so much!

How much do you love Highland Wildlife Park animals now? \*

0-1-2-3-4-5  
0—Not at all  
5—So, so, so much!

How much do you love animal stories now? \*

0-1-2-3-4-5  
0—Not at all  
10—So, so, so much!

What was your favourite part of Virtual Summer School? \*

Your answer

What else would you have liked to do at Virtual Summer School? \*

Your answer

Describe how learning and discovering through the online classroom was for you and your family. \*

Your answer

Please add any other feedback for us below. Thank you! \*
